# Supplementary material for: Research Progress of Diffusion Model in Crowd Activity Analysis
Source: Research Square preprint supplement (doi:10.21203/rs.3.rs-7495913/v1), 2025-10-07
Supplement: Supplementary file 1 [file b1a265f50dc35024ada964b6.docx]

## Highlights

- This paper presents systematic review of diffusion models applied to crowd activity analysis.
- It summarizes key advancements in diffusion models, including noise scheduling, sampling strategies, and architecture design.
- The review classifies diffusion-based anomaly detection methods into weakly supervised and unsupervised paradigms.
- It discusses the broader applications of diffusion models in crowd counting, tracking, trajectory prediction, and 3D pose estimation.
- Explores future directions of diffusion models in human-centric visual tasks such as behavior understanding and motion analysis.
